# Supplementary material for: Aberrant Expression of FBXO2 Disrupts Glucose Homeostasis Through Ubiquitin-Mediated Degradation of Insulin Receptor in Obese Mice
Source: Oxford University Press journal article supplement (doi:10.2337/db16-1104), 2016-12-08
Supplement: db161104supplementarydata3.xls [file db161104supplementarydata3.xls]

## Sheet: KEGG pathway analysis
Supplementary Table S2: Bioinformatic analysis of the glycoproteins identified from cells overexpressing WT FBXO2.
KEGG pathway	PValue	Benjamini
hsa04142:Lysosome	1.08161e-28	1.46018e-26
hsa04512:ECM-receptor interaction	7.06529e-17	7.54952e-15
hsa00534:Heparan sulfate biosynthesis	1.36425e-08	6.13914e-07
hsa04510:Focal adhesion	3.07943e-08	1.03931e-06
hsa05412:Arrhythmogenic right ventricular cardiomyopathy (ARVC)	9.93859e-08	2.68342e-06
hsa00510:N-Glycan biosynthesis	1.7914e-07	4.03063e-06
hsa00531:Glycosaminoglycan degradation	2.63374e-07	5.07935e-06
hsa00511:Other glycan degradation	2.87908e-07	4.85843e-06
hsa05414:Dilated cardiomyopathy	3.61335e-07	5.42001e-06
hsa00532:Chondroitin sulfate biosynthesis	4.26654e-07	5.75981e-06
hsa05410:Hypertrophic cardiomyopathy (HCM)	5.55605e-07	6.81876e-06
hsa04514:Cell adhesion molecules (CAMs)	5.56155e-06	6.25656e-05

## Sheet: Molecular function
Supplementary Table S2: Bioinformatic analysis of the glycoproteins identified from cells overexpressing WT FBXO2.
GO Term	Description	PValue	Adjusted pvalue
GO:0005509	calcium ion binding	1.51193e-22	1.05835e-19
GO:0030246	carbohydrate binding	9.587e-11	3.35545e-08
GO:0005178	integrin binding	4.40663e-09	1.02821e-06
GO:0015923	mannosidase activity	6.37887e-09	1.1163e-06
GO:0005529	sugar binding	2.22253e-08	3.11153e-06
GO:0032403	protein complex binding	1.06785e-07	1.24582e-05
GO:0008233	peptidase activity	1.17284e-07	1.17283e-05
GO:0019838	growth factor binding	2.75099e-07	2.40709e-05
GO:0043167	ion binding	3.84588e-07	2.9912e-05
GO:0048029	monosaccharide binding	4.37209e-07	3.06041e-05
GO:0070011	peptidase activity, acting on L-amino acid peptides	6.49032e-07	4.13012e-05
GO:0008238	exopeptidase activity	1.09762e-06	6.4026e-05
GO:0043169	cation binding	1.61038e-06	8.6709e-05
GO:0008237	metallopeptidase activity	2.24935e-06	0.000112461
GO:0031418	L-ascorbic acid binding	2.94824e-06	0.000137575
GO:0051082	unfolded protein binding	4.83956e-06	0.000211709
GO:0004185	serine-type carboxypeptidase activity	5.46487e-06	0.000225
GO:0015924	mannosyl-oligosaccharide mannosidase activity	7.985e-06	0.000310481
GO:0004576	oligosaccharyl transferase activity	7.985e-06	0.000310481
GO:0008484	sulfuric ester hydrolase activity	1.0671e-05	0.000393069
GO:0070008	serine-type exopeptidase activity	1.59706e-05	0.000558821
GO:0005201	extracellular matrix structural constituent	2.15993e-05	0.000719725
GO:0016706	oxidoreductase activity, acting on paired donors, with incorporation or reduction of molecular oxygen, 2-oxoglutarate as one donor, and incorporation of one atom each of oxygen into both donors	2.46224e-05	0.000783142

## Sheet: Cellular component
Supplementary Table S2: Bioinformatic analysis of the glycoproteins identified from cells overexpressing WT FBXO2.
GO Term	Description	PValue	Adjusted pvalue
GO:0016021	integral to membrane	1.50725e-42	5.51652e-40
GO:0005783	endoplasmic reticulum	1.14217e-39	1.39345e-37
GO:0005764	lysosome	1.68996e-28	1.23705e-26
GO:0000323	lytic vacuole	1.68996e-28	1.23705e-26
GO:0005788	endoplasmic reticulum lumen	8.00672e-17	5.77316e-15
GO:0042175	nuclear envelope-endoplasmic reticulum network	4.17296e-15	1.71529e-13
GO:0012505	endomembrane system	3.14791e-14	1.15397e-12
GO:0009986	cell surface	2.01703e-13	6.71208e-12
GO:0005578	proteinaceous extracellular matrix	2.93471e-10	8.95086e-09
GO:0031012	extracellular matrix	3.00044e-10	8.4474e-09
GO:0005604	basement membrane	1.83514e-09	4.79759e-08
GO:0005773	vacuole	6.79346e-26	4.14401e-24
GO:0044420	extracellular matrix part	3.37313e-09	8.23044e-08
GO:0044421	extracellular region part	3.9943e-09	9.13696e-08
GO:0009897	external side of plasma membrane	4.52952e-09	9.75179e-08
GO:0005624	membrane fraction	1.20585e-08	2.45189e-07
GO:0000267	cell fraction	1.3939e-08	2.68509e-07
GO:0005789	endoplasmic reticulum membrane	4.80241e-16	2.03171e-14
GO:0031224	intrinsic to membrane	1.0823e-40	1.98061e-38
GO:0042470	melanosome	1.91754e-08	3.50911e-07
GO:0048770	pigment granule	1.91754e-08	3.50911e-07
GO:0008305	integrin complex	3.20675e-08	5.58891e-07
GO:0044432	endoplasmic reticulum part	1.62299e-29	1.48504e-27
GO:0031090	organelle membrane	5.13621e-08	8.54479e-07
GO:0005626	insoluble fraction	5.56393e-08	8.8539e-07
GO:0031226	intrinsic to plasma membrane	5.65283e-08	8.62057e-07
GO:0005887	integral to plasma membrane	7.38639e-08	1.08137e-06
GO:0005794	Golgi apparatus	1.24082e-07	1.7467e-06
GO:0031300	intrinsic to organelle membrane	2.51432e-07	3.40829e-06
GO:0044431	Golgi apparatus part	2.93544e-07	3.83703e-06
GO:0005605	basal lamina	3.4775e-07	4.38883e-06
GO:0043256	laminin complex	7.32011e-07	8.93049e-06
GO:0031227	intrinsic to endoplasmic reticulum membrane	1.04525e-06	1.23406e-05
GO:0031982	vesicle	1.44028e-06	1.64731e-05
GO:0031410	cytoplasmic vesicle	1.70436e-06	1.89027e-05
GO:0031988	membrane-bounded vesicle	2.03989e-06	2.19586e-05
GO:0005576	extracellular region	2.99624e-06	3.13316e-05
GO:0016023	cytoplasmic membrane-bounded vesicle	3.9249e-06	3.99024e-05
GO:0005606	laminin-1 complex	4.14153e-06	4.09668e-05
GO:0031301	integral to organelle membrane	1.44831e-05	0.000139487

## Sheet: Biological process
Supplementary Table S2: Bioinformatic analysis of the glycoproteins identified from cells overexpressing WT FBXO2.
GO Term	Description	PValue	Adjusted pvalue
GO:0009100	glycoprotein metabolic process	4.61072e-24	3.84842e-21
GO:0022610	biological adhesion	3.29366e-24	4.12366e-21
GO:0007155	cell adhesion	2.9894e-24	7.48546e-21
GO:0009101	glycoprotein biosynthetic process	3.68118e-16	2.085e-13
GO:0043413	biopolymer glycosylation	1.23978e-11	6.20879e-09
GO:0006486	protein amino acid glycosylation	1.23978e-11	6.20879e-09
GO:0070085	glycosylation	1.23978e-11	6.20879e-09
GO:0031589	cell-substrate adhesion	1.31995e-10	5.5086e-08
GO:0007229	integrin-mediated signaling pathway	1.80705e-10	6.46408e-08
GO:0005976	polysaccharide metabolic process	1.35782e-09	3.39998e-07
GO:0006029	proteoglycan metabolic process	1.35411e-09	3.76742e-07
GO:0007160	cell-matrix adhesion	1.30674e-09	4.09008e-07
GO:0000271	polysaccharide biosynthetic process	2.53552e-09	5.77176e-07
GO:0006022	aminoglycan metabolic process	4.62035e-09	9.64113e-07
GO:0006023	aminoglycan biosynthetic process	3.75404e-08	6.71435e-06
GO:0030203	glycosaminoglycan metabolic process	3.66298e-08	7.05545e-06
GO:0051270	regulation of cell motion	6.46896e-08	1.07988e-05
GO:0007033	vacuole organization	7.68146e-08	1.20214e-05
GO:0007040	lysosome organization	8.81762e-08	1.29878e-05
GO:0030334	regulation of cell migration	1.01345e-07	1.40981e-05
GO:0030201	heparan sulfate proteoglycan metabolic process	1.67111e-07	2.20232e-05
GO:0040012	regulation of locomotion	2.42051e-07	3.03043e-05
GO:0006024	glycosaminoglycan biosynthetic process	2.82261e-07	3.36557e-05
GO:0016337	cell-cell adhesion	4.10466e-07	4.67174e-05
GO:0001568	blood vessel development	4.48107e-07	4.87841e-05
GO:0010033	response to organic substance	4.818e-07	5.02665e-05
GO:0001944	vasculature development	7.16098e-07	7.17219e-05
GO:0033627	cell adhesion mediated by integrin	1.00346e-06	9.6636e-05
GO:0006506	GPI anchor biosynthetic process	1.71058e-06	0.000158628
GO:0006487	protein amino acid N-linked glycosylation	2.07554e-06	0.000185596
GO:0006505	GPI anchor metabolic process	2.23221e-06	0.000192722
GO:0008654	phospholipid biosynthetic process	2.37445e-06	0.000198168
GO:0006457	protein folding	3.68862e-06	0.000297902
GO:0006643	membrane lipid metabolic process	4.14123e-06	0.000323999
GO:0016051	carbohydrate biosynthetic process	4.37453e-06	0.00033188
GO:0046489	phosphoinositide biosynthetic process	7.4011e-06	0.000529358
GO:0051272	positive regulation of cell motion	7.27668e-06	0.000535765
GO:0040017	positive regulation of locomotion	7.27668e-06	0.000535765
GO:0009311	oligosaccharide metabolic process	8.04249e-06	0.000559246
GO:0006665	sphingolipid metabolic process	1.00234e-05	0.000678115
GO:0018279	protein amino acid N-linked glycosylation via asparagine	1.10338e-05	0.000726812
GO:0018196	peptidyl-asparagine modification	1.10338e-05	0.000726812
GO:0006672	ceramide metabolic process	1.13427e-05	0.000727997
GO:0030335	positive regulation of cell migration	1.20316e-05	0.000752897
GO:0002474	antigen processing and presentation of peptide antigen via MHC class I	1.55825e-05	0.0008864
GO:0030198	extracellular matrix organization	1.46495e-05	0.000894299
GO:0048514	blood vessel morphogenesis	1.55727e-05	0.000906431
GO:0043062	extracellular structure organization	1.54634e-05	0.000921495
GO:0015012	heparan sulfate proteoglycan biosynthetic process	1.96489e-05	0.00109276
GO:0046519	sphingoid metabolic process	2.05403e-05	0.00111749
GO:0046474	glycerophospholipid biosynthetic process	2.10785e-05	0.00112237
GO:0030166	proteoglycan biosynthetic process	2.22441e-05	0.00113609
GO:0030155	regulation of cell adhesion	2.27572e-05	0.00113904
GO:0051604	protein maturation	2.21219e-05	0.00115337
GO:0006928	cell motion	2.51527e-05	0.00121048
GO:0008610	lipid biosynthetic process	2.50089e-05	0.00122715
